# Supplementary material
Source: PubMed Central journal article supplement (PMC1859932)

A

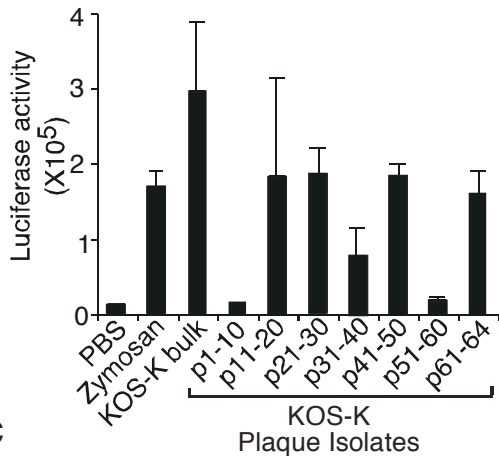

B

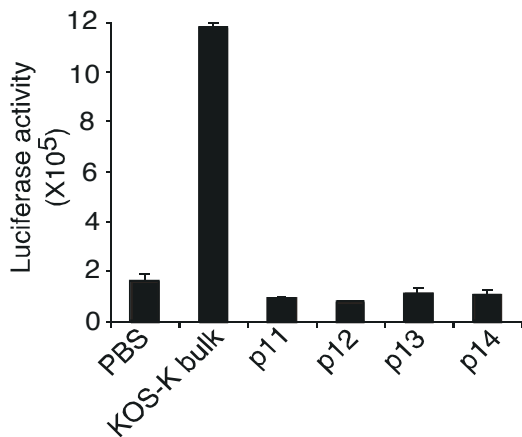

C

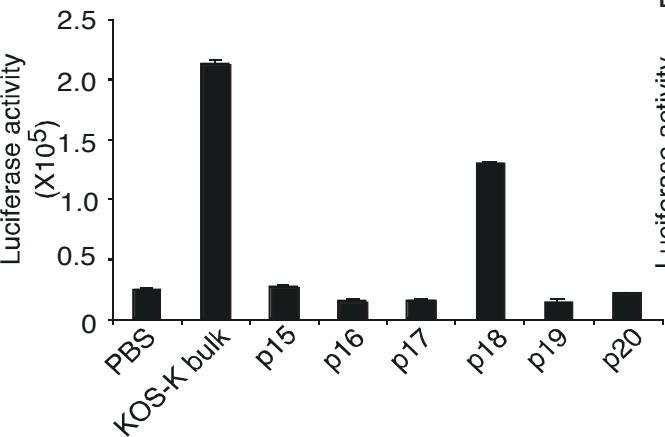

D

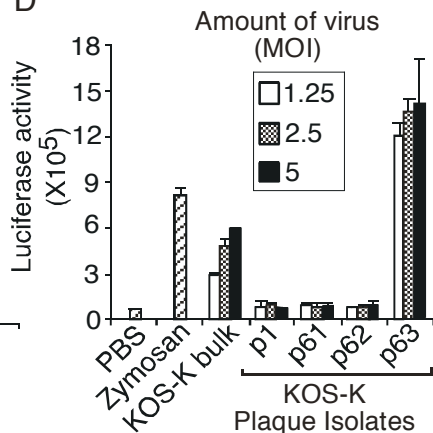

Supplement: pnas_0605102103_1.pdf [file pnas_0605102103_1.pdf]

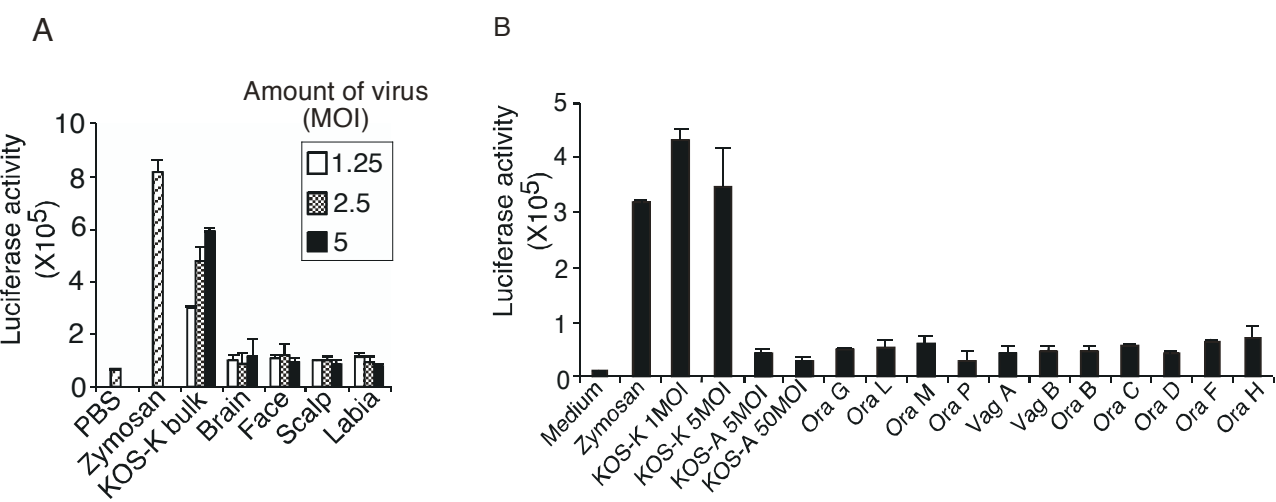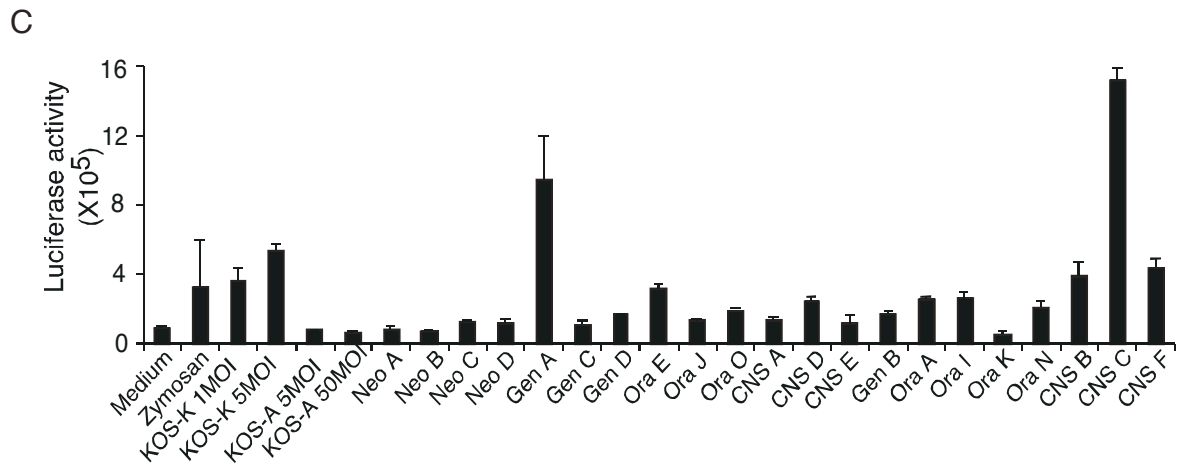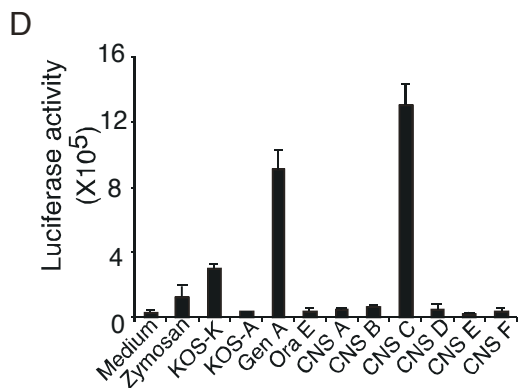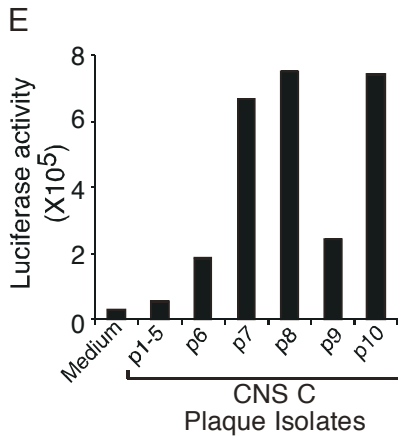

Supplement: pnas_0605102103_2.pdf [file pnas_0605102103_2.pdf]

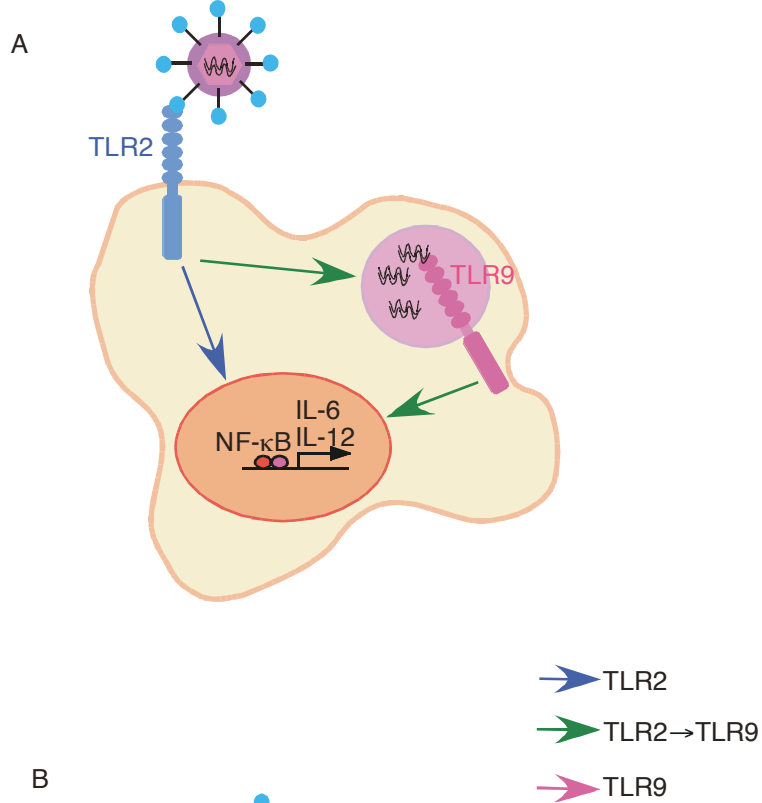

Supplement: pnas_0605102103_3.pdf [file pnas_0605102103_3.pdf]
